# Supplementary material
Source: PubMed Central journal article supplement (PMC7649717)
Supplement: NIHMS1643166-supplement-Supporting_Information.pdf [file NIHMS1643166-supplement-Supporting_Information.pdf]

# Supporting Information

## **$^{129}\text{Xe}$ NMR-Protein Sensor Reveals Cellular Ribose Concentration**

Serge D. Zemerov,<sup>1,‡</sup> Benjamin W. Roose,<sup>1,‡</sup> Kelsey L. Farenhem,<sup>1,‡</sup> Zhuangyu Zhao,<sup>1</sup> Madison A. Stringer,<sup>1</sup> Aaron R. Goldman,<sup>2</sup> David W. Speicher,<sup>2,3</sup> and Ivan J. Dmochowski<sup>1,\*</sup>

<sup>1</sup> Department of Chemistry, University of Pennsylvania, Philadelphia, PA 19104, USA.

<sup>2</sup> Proteomics and Metabolomics Facility and <sup>3</sup> Molecular and Cellular Oncogenesis Program, The Wistar Institute, Philadelphia, PA 19104, USA.

### Table of Contents

|                                                                                                                         |    |
|-------------------------------------------------------------------------------------------------------------------------|----|
| Table S1. Oligonucleotide primers used for RBP(L19A) insert amplification.....                                          | 2  |
| Table S2. Oligonucleotide primers used in RBP site-directed mutagenesis.....                                            | 2  |
| Figure S1. SDS-PAGE gel of purified GFP-RBP(L19A).....                                                                  | 2  |
| Figure S2. ITC enthalpograms for ribose binding .....                                                                   | 3  |
| Figure S3. CD spectra of GFP-RBP(L19A) and mutants .....                                                                | 4  |
| Figure S4. Hyper-CEST z-spectra of 10 $\mu\text{M}$ GFP-RBP(L19A) in PBS .....                                          | 5  |
| Figure S5. Hyper-CEST z-spectra of GFP-RBP(L19A) in FBS and serum-free medium.....                                      | 6  |
| Figure S6. LC-MS response of [ $\text{U-}^{13}\text{C}_5$ ] ribose spiked into extracted HeLa cell lysate samples ..... | 7  |
| Figure S7. Hyper-CEST z-spectra of GFP-RBP(L19A) in FBS-supplemented HeLa cell lysate .....                             | 8  |
| Figure S8. Ribose calibration curve for LC-MS analysis .....                                                            | 9  |
| Table S3. Peak areas and calculated ribose concentrations from LC-MS analysis .....                                     | 10 |
| Figure S9. Time dependent saturation curves with GFP-RBP(L19A).....                                                     | 11 |
| Figure S10. Saturation contrast as a function of ribose-bound RBP .....                                                 | 12 |
| Figure S11. Hyper-CEST z-spectra of RBP mutants.....                                                                    | 13 |
| References.....                                                                                                         | 14 |

**Table S1. Oligonucleotide primers used for RBP(L19A) insert amplification.**

---

|                |                                                        |
|----------------|--------------------------------------------------------|
| Forward primer | 5' – TACTTCCAATCCAATGCAAAAGATACCATCGCGCTGGTCG – 3'     |
| Reverse primer | 5' – TTATCCACTTCCAATGTTATTACTGTTTGACAACCAGTTTCAGG – 3' |

---

**Table S2. Oligonucleotide primers used in RBP site-directed mutagenesis.**

---

|       |                |                                       |
|-------|----------------|---------------------------------------|
| Q235A | Forward primer | 5' – GCGACGATTGCAGCGCTGCCGGACCAG – 3' |
|       | Reverse primer | 5' – CTGGTCCGGCAGCGCTGCAATCGTCGC – 3' |
| T135A | Forward primer | 5' – GGTATCGCGGGTGCCAGCGCTGCGCGC – 3' |
|       | Reverse primer | 5' – GCGCGCAGCGCTGGCACCCGCGATACC – 3' |

---

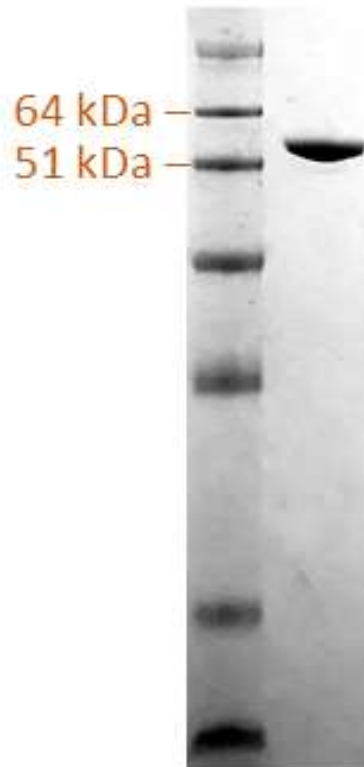

**Figure S1. SDS-PAGE gel of purified GFP-RBP(L19A).**

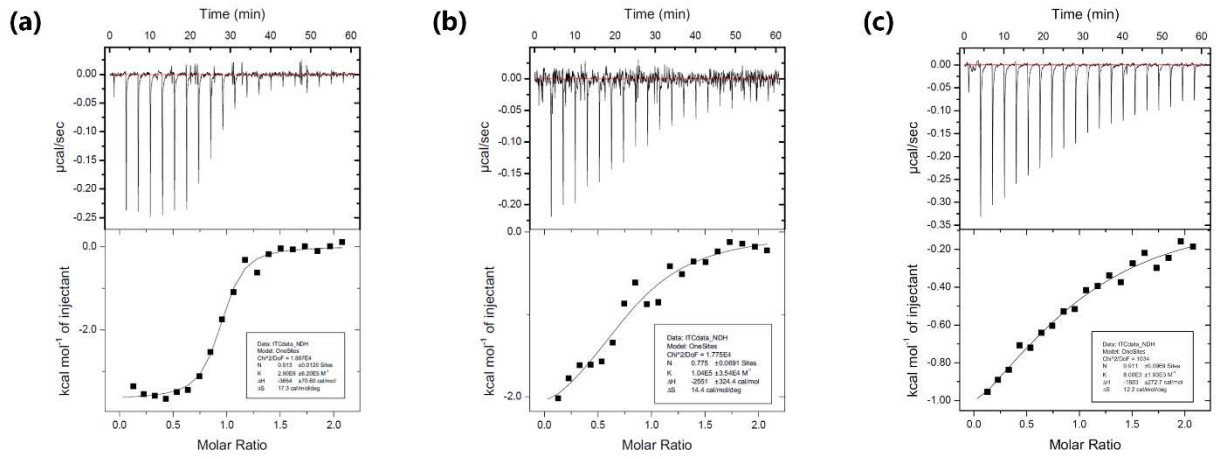

**Figure S2.** ITC enthalpograms for ribose binding for (a) GFP-RBP(L19A); (b) GFP-RBP(L19A/Q235A); (c) GFP-RBP(L19A/T135A/Q235A).

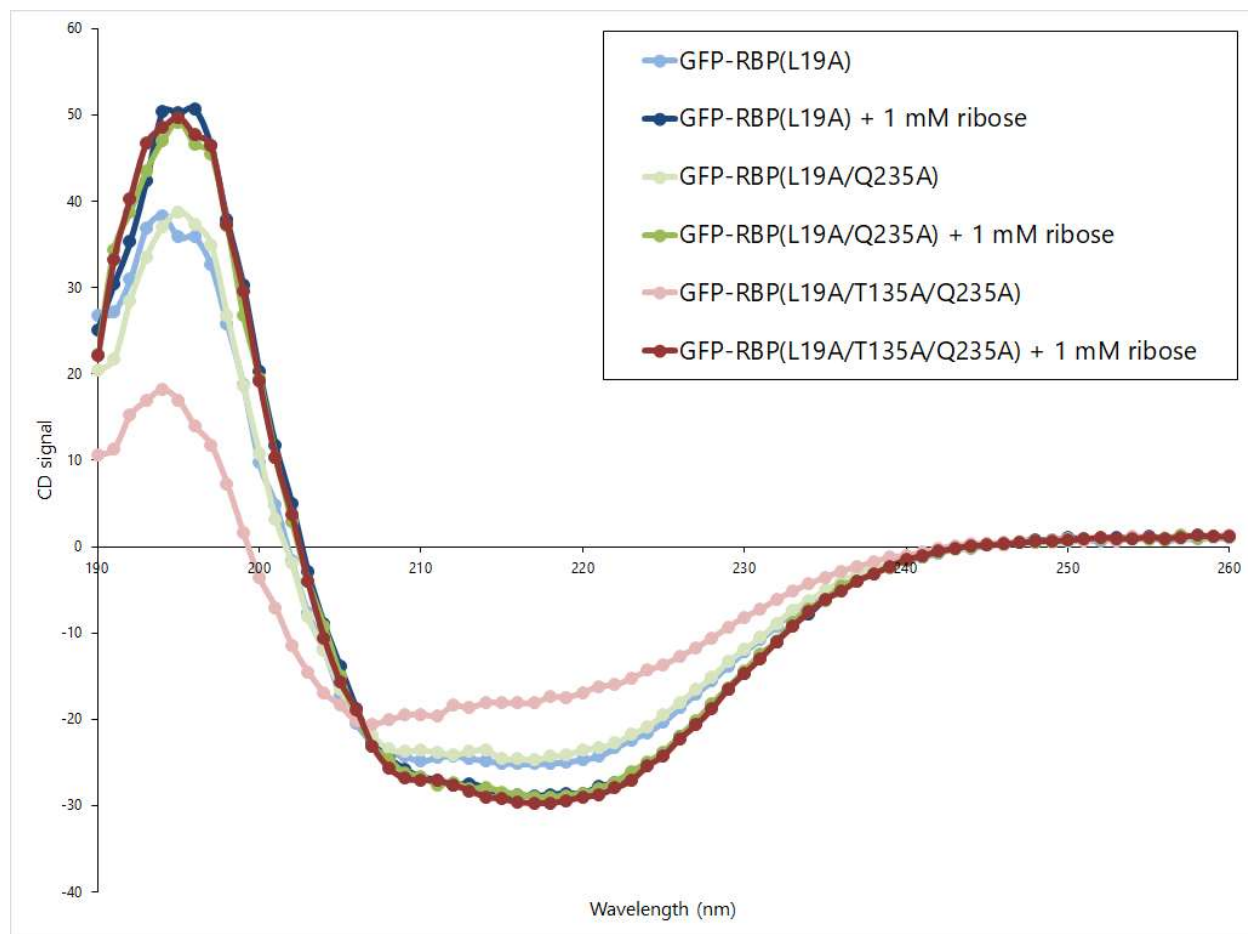

**Figure S3.** CD spectra of GFP-RBP(L19A) and mutants. Spectra taken from 5  $\mu$ M protein in 10 mM sodium phosphate buffer (pH 8.0) at 20  $^{\circ}$ C.

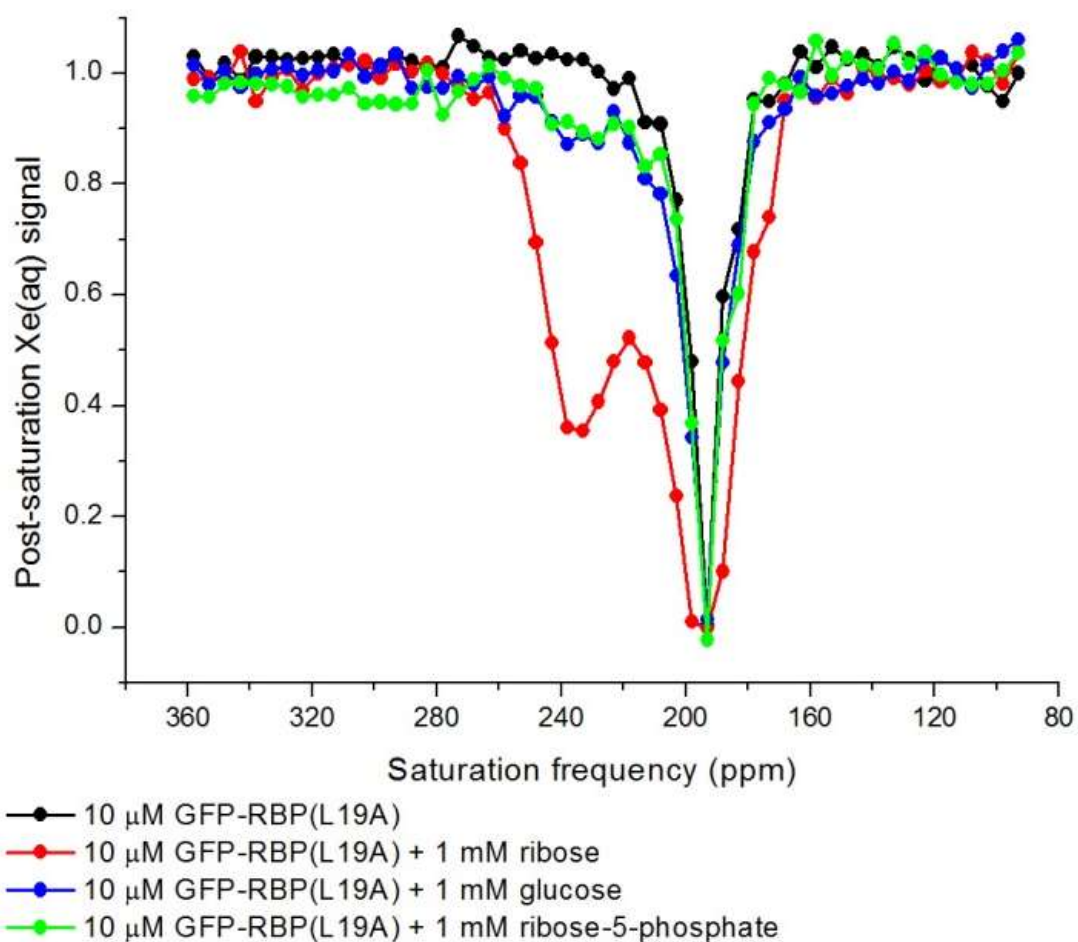

**Figure S4.** Hyper-CEST z-spectra of 10  $\mu$ M GFP-RBP(L19A) in PBS. Data acquired with protein in its unliganded state and in the presence of indicated ligands in pH 7.2 buffer at 300 K. Data shown as an average of 3 trials.

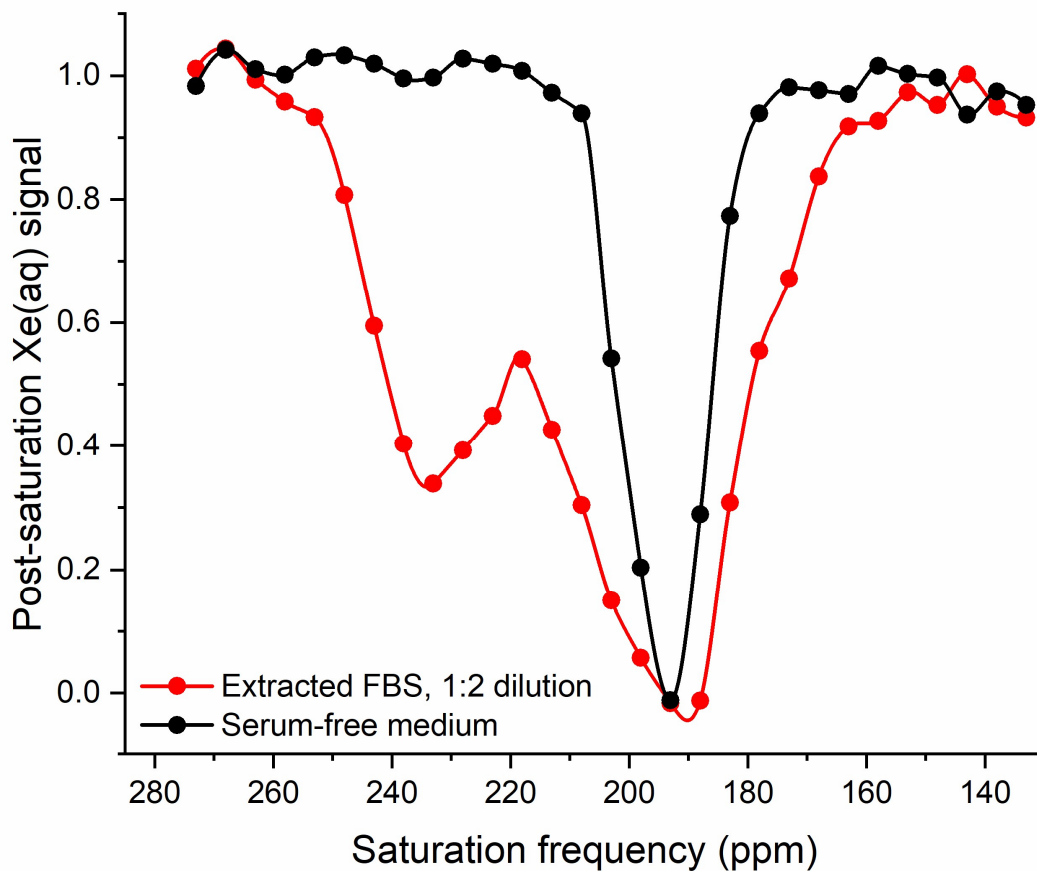

**Figure S5.** Hyper-CEST z-spectra of GFP-RBP(L19A) in FBS and serum-free medium. FBS was extracted with methanol following literature procedure<sup>1</sup> and then diluted 1:2 in PBS buffer. Pulse length,  $\tau_{\text{pulse}} = 3.80$  ms; field strength,  $B_{1,\text{max}} = 77$   $\mu\text{T}$ . Experiments were performed at 300 K with 20  $\mu\text{M}$  protein. Data shown as an average of 3 trials.

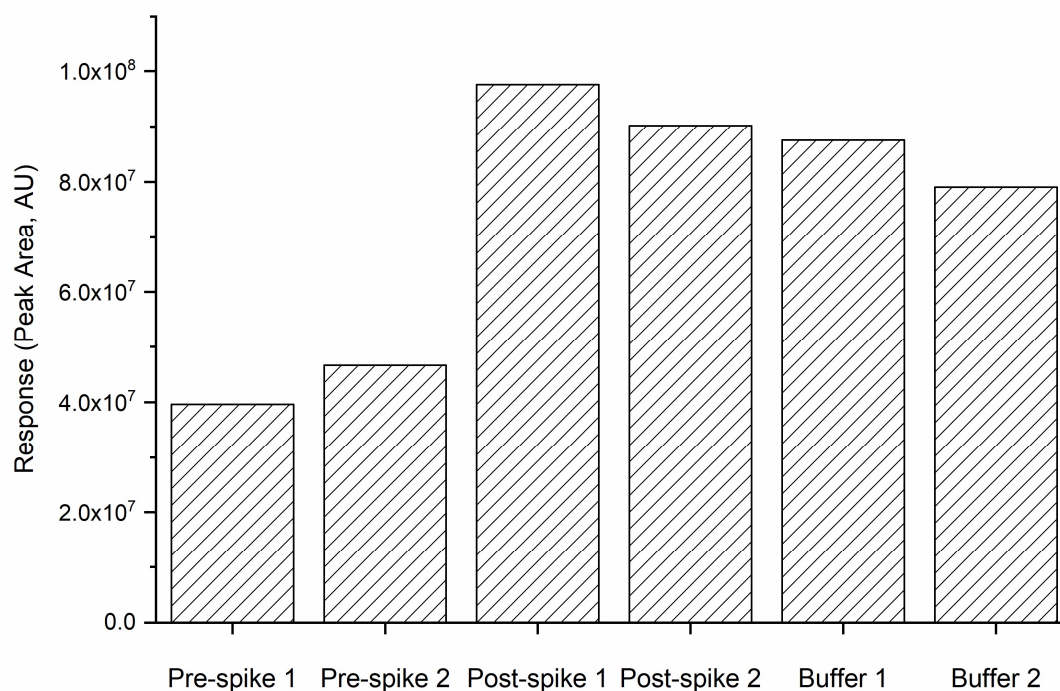

**Figure S6.** LC-MS response of [U-<sup>13</sup>C<sub>5</sub>] ribose spiked into extracted HeLa cell lysate samples. “Pre-spike” corresponds to samples of 2 million/mL lysed HeLa cell extract spiked pre-extraction with [U-<sup>13</sup>C<sub>5</sub>] ribose to a final concentration of 20 μM. “Post-spike” corresponds to samples of 2 million/mL lysed HeLa cell extract spiked post-extraction with [U-<sup>13</sup>C<sub>5</sub>] ribose to a final concentration of 20 μM. “Buffer” corresponds to controls of the extraction solution only (1:2 ddH<sub>2</sub>O:MeOH v/v) spiked with [U-<sup>13</sup>C<sub>5</sub>] ribose to a final concentration of 20 μM. Each sample was injected twice. The acetate adduct peak was quantified. The peak areas for each sample are shown in Table S3.

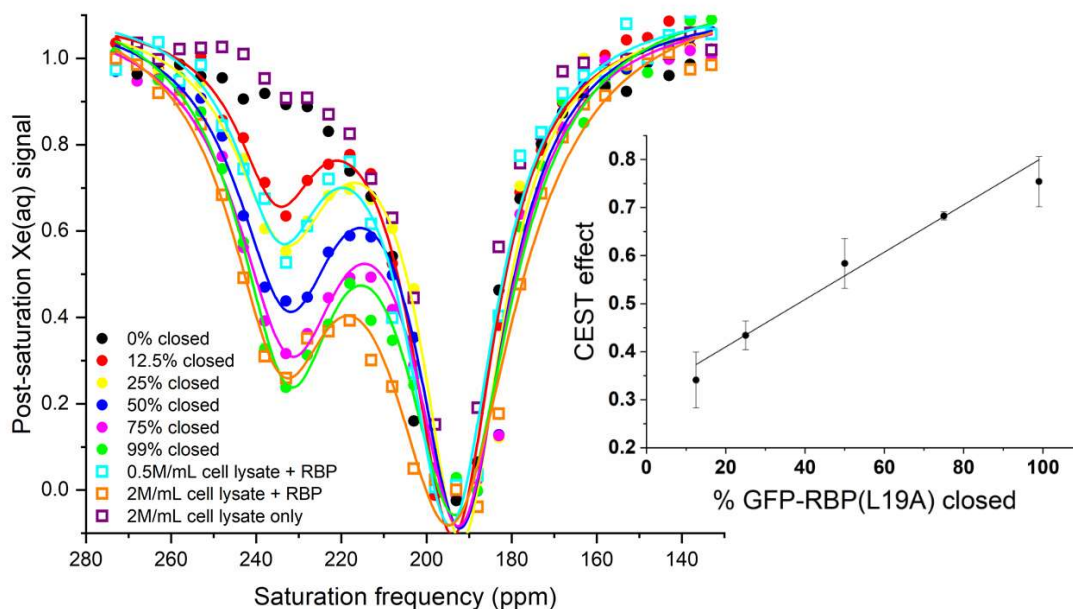

**Figure S7.** Hyper-CEST z-spectra of GFP-RBP(L19A) in FBS-supplemented HeLa cell lysate. Z-spectra of varying percentages of GFP-RBP(L19A) in the closed conformation ( $[\text{ribose}] = 0, 2.5, 5.1, 10.3, 15.9, 49.5 \mu\text{M}$ ), and with cell lysate from HeLa cells grown in FBS-supplemented medium are shown. The z-spectrum of cell lysate only is shown for reference. All z-spectra were obtained with  $20 \mu\text{M}$  GFP-RBP(L19A) in pH 7.2 PBS at 300 K. Pulse length,  $\tau_{\text{pulse}} = 3.80 \text{ ms}$ ; field strength,  $B_{1,\text{max}} = 77 \mu\text{T}$ . Data shown as an average of 3 trials. Inset: the magnitude of the CEST effect from each z-spectrum plotted against the percentage of closed RBP.  $R^2 = 0.982$ .



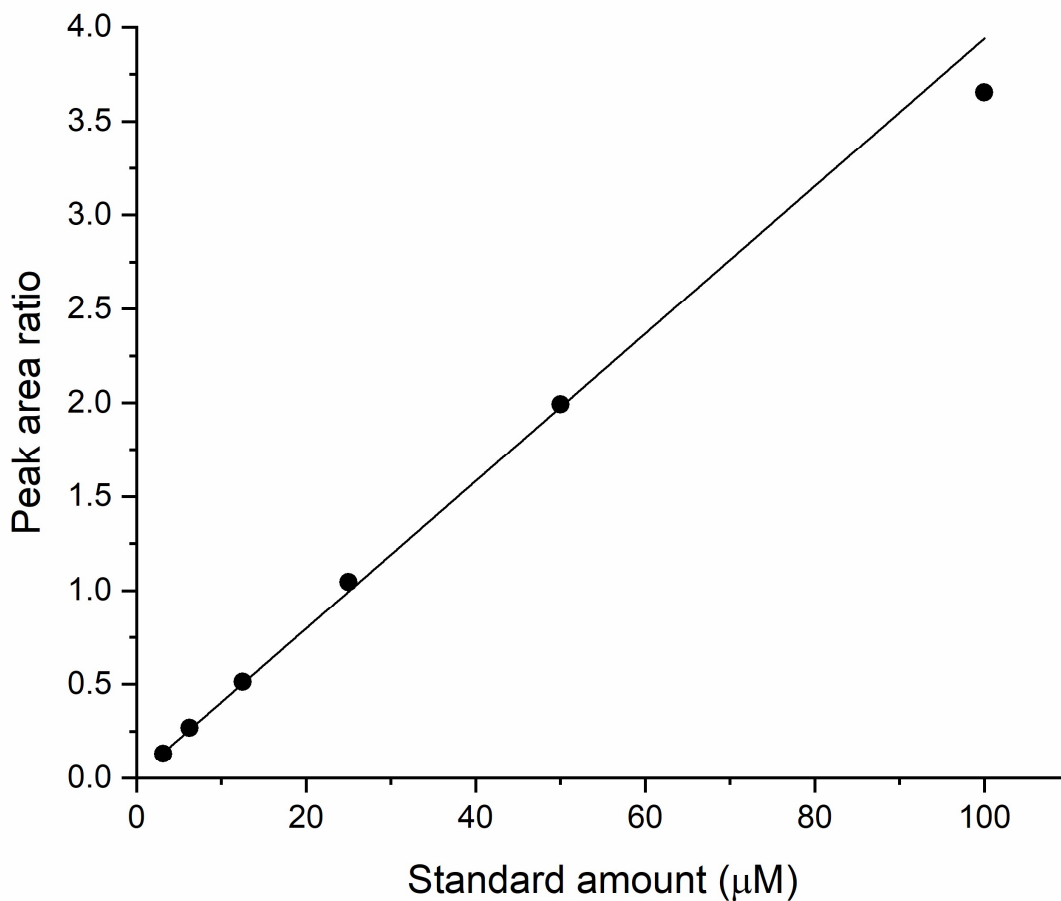

**Figure S8.** Ribose calibration curve for LC-MS analysis. Ribose was quantified as the ratio of the ribose standard peak area to the [U-<sup>13</sup>C<sub>5</sub>] ribose internal standard peak area. The ribose standard concentrations used were 3.13, 6.25, 12.5, 25, 50, and 100 µM, with 20 µM [U-<sup>13</sup>C<sub>5</sub>] ribose internal standard.  $R^2 = 0.995$ , slope =  $0.0393 \pm 0.001$ , y-intercept =  $0.0121 \pm 0.008$ . The acetate adduct peak was quantified. The peak areas for each sample are shown in Table S3.

**Table S3.** Peak areas and calculated ribose concentrations from LC-MS analysis.<sup>a</sup>

|                                                           | 3.13<br>$\mu\text{M}$<br>ribose | 6.25<br>$\mu\text{M}$<br>ribose | 12.5<br>$\mu\text{M}$<br>ribose | 25 $\mu\text{M}$<br>ribose | 50 $\mu\text{M}$<br>ribose | 100<br>$\mu\text{M}$<br>ribose | Pre-<br>spike 1  | Pre-<br>spike 2  | Post-<br>spike 1 | Post-<br>spike 2 | Buffer<br>1      | Buffer<br>2      |
|-----------------------------------------------------------|---------------------------------|---------------------------------|---------------------------------|----------------------------|----------------------------|--------------------------------|------------------|------------------|------------------|------------------|------------------|------------------|
| Ribose<br>peak area                                       | 1.85 x<br>$10^7$                | 4.37 x<br>$10^7$                | 7.73 x<br>$10^7$                | 1.49 x<br>$10^8$           | 2.73 x<br>$10^8$           | 4.73 x<br>$10^8$               | 6.39 x<br>$10^7$ | 6.75 x<br>$10^7$ | 6.23 x<br>$10^7$ | 6.27 x<br>$10^7$ | N/F              | N/F              |
| [U- <sup>13</sup> C <sub>5</sub> ]<br>ribose<br>peak area | 1.41 x<br>$10^8$                | 1.63 x<br>$10^8$                | 1.51 x<br>$10^8$                | 1.42 x<br>$10^8$           | 1.37 x<br>$10^8$           | 1.29 x<br>$10^8$               | 3.96 x<br>$10^7$ | 4.67 x<br>$10^7$ | 9.76 x<br>$10^7$ | 9.02 x<br>$10^7$ | 8.75 x<br>$10^7$ | 7.90 x<br>$10^7$ |
| Light/<br>heavy<br>ratio                                  | 0.13                            | 0.27                            | 0.51                            | 1.05                       | 1.99                       | 3.66                           | 1.61             | 1.45             | 0.64             | 0.70             | N/A              | N/A              |
| Calculated<br>ribose<br>( $\mu\text{M}$ )                 | 3.02                            | 6.54                            | 12.7                            | 26.3                       | 50.4                       | 92.7                           | <b>40.7</b>      | <b>36.5</b>      | <b>15.9</b>      | <b>17.4</b>      | N/A              | N/A              |

<sup>a</sup>All samples spiked with [U-<sup>13</sup>C<sub>5</sub>] ribose to a final concentration of 20  $\mu\text{M}$ . The “pre-spike”, “post-spike”, and “buffer” terms refer to the same conditions as described in Figure S6. The acetate adduct peak was quantified.

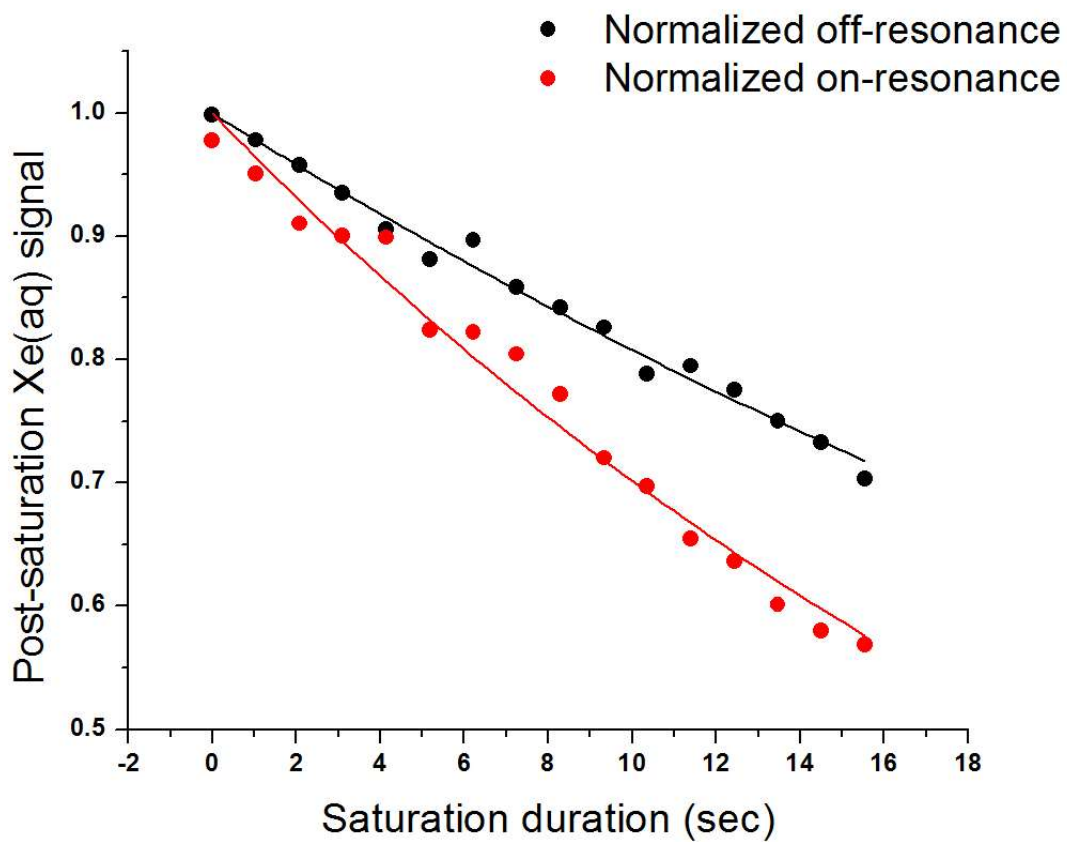

**Figure S9.** Time dependent saturation curves with GFP-RBP(L19A). Saturation contrast for 100 nM GFP-RBP(L19A) with 1 mM ribose at 300 K in pH 7.2 PBS buffer was determined to be  $0.30 \pm 0.01$ .  $T_{1\text{on}} = 28 \pm 1$  s and  $T_{1\text{off}} = 47 \pm 1$  s. Pulse length,  $\tau_{\text{pulse}} = 1.727$  ms; field strength,  $B_{1,\text{max}} = 170$   $\mu\text{T}$ . Data shown as an average of three trials.

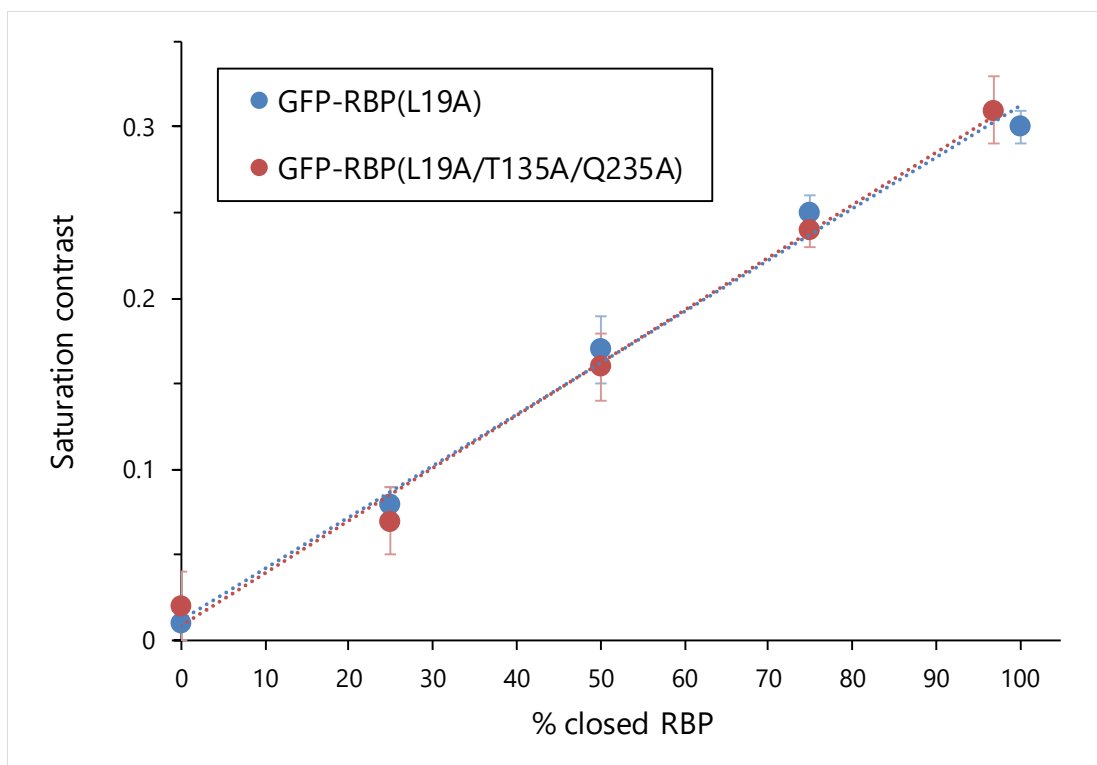

**Figure S10.** Saturation contrast as a function of ribose-bound RBP. Saturation contrast for 100 nM GFP-RBP(L19A) and 100 nM GFP-RBP(L19A/T135A/Q235A) at 300 K in pH 7.2 PBS buffer as a function of percent protein in the ribose-bound, closed conformation. For GFP-RBP(L19A), ( $K_d = 0.3 \mu\text{M}$ ) [ribose] = 0, 0.15, 0.35, 0.975, 1000  $\mu\text{M}$ . For GFP-RBP(L19A/T135A/Q235A), ( $K_d = 130 \mu\text{M}$ ) [ribose] = 0, 43, 130, 390, 4000  $\mu\text{M}$ . Pulse length,  $\tau_{\text{pulse}} = 1.727 \text{ ms}$ ; field strength,  $B_{1,\text{max}} = 170 \mu\text{T}$ . Data shown as an average of three trials. Linear regressions for both sets of data reported  $R^2$  values  $> 0.99$ .

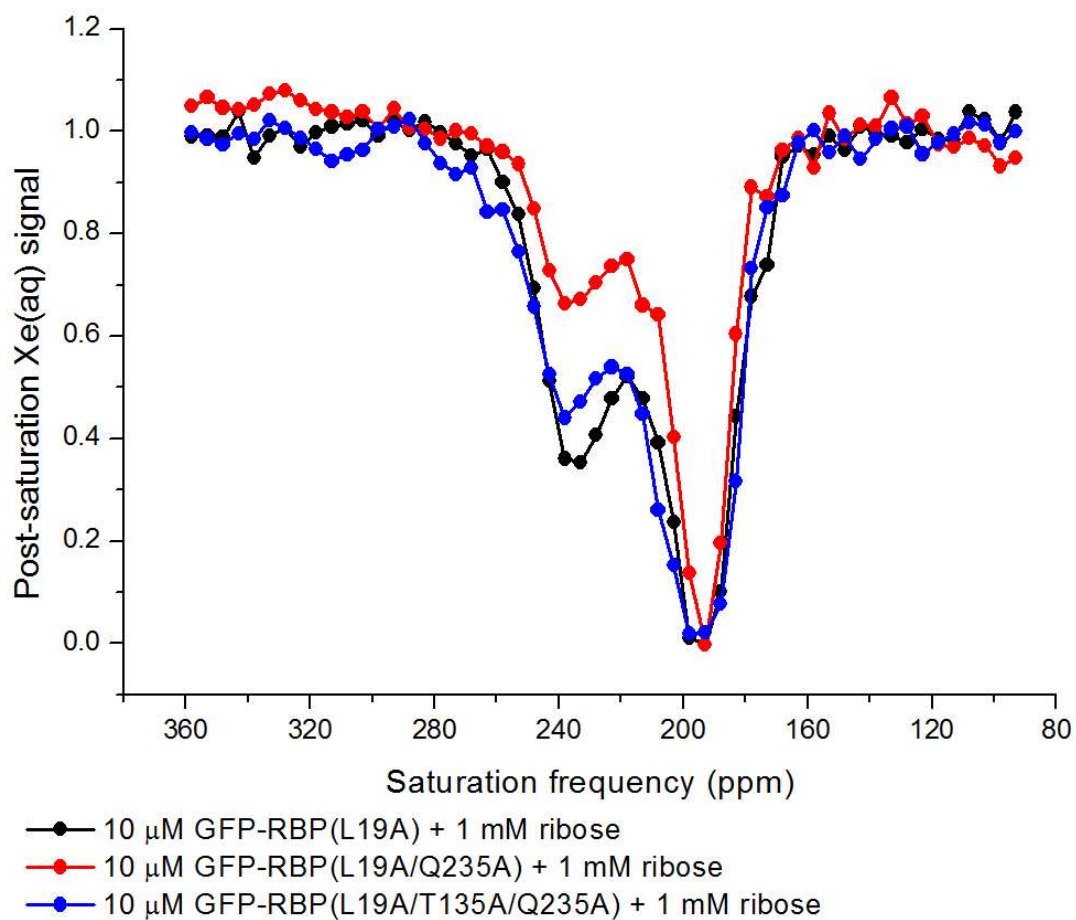

**Figure S11.** Hyper-CEST z-spectra of RBP mutants. Data acquired in pH 7.2 PBS at 300 K. Pulse length,  $\tau_{\text{pulse}} = 3.80$  ms; field strength,  $B_{1,\text{max}} = 77$   $\mu$ T. Data shown as an average of 3 trials.

## References

- (1) Nagana Gowda, G. A.; Djukovic, D.; Bettcher, L. F.; Gu, H.; Raftery, D. *Anal. Chem.* **2018**, *90* (3), 2001–2009.
